# Supplementary material for: Interfacial aspect of ZnTe/In2Te3 heterostructures as an efficient catalyst for the hydrogen evolution reaction
Source: Royal Society of Chemistry journal article supplement (doi:10.1039/c9ta09687f), 2019-01-01
Supplement: c9ta09687f1.pdf [file c9ta09687f1.pdf]

## Supporting Information

### Interfacial aspect of ZnTe/In<sub>2</sub>Te<sub>3</sub> heterostructures as an efficient catalyst for hydrogen evolution reaction

Xiaoyong Yang <sup>a,b</sup>, Amitava Banerjee <sup>b\*</sup>, Zhitong Xu,<sup>a</sup> Ziwei Wang,<sup>a</sup> Rajeev Ahuja <sup>b,c\*</sup>

<sup>a</sup> Southwest University of Science and Technology, Mianyang 621010, China

<sup>b</sup> Condensed Matter Theory Group, Materials Theory Division, Department of Physics and Astronomy, Uppsala University, Box 516, 75120 Uppsala, Sweden

<sup>c</sup> Applied Materials Physics, Department of Materials and Engineering, Royal Institute of Technology (KTH), S-100 44 Stockholm, Sweden

\* Corresponding author: amitava245@gmail.com; rajeev.ahuja@physics.uu.se

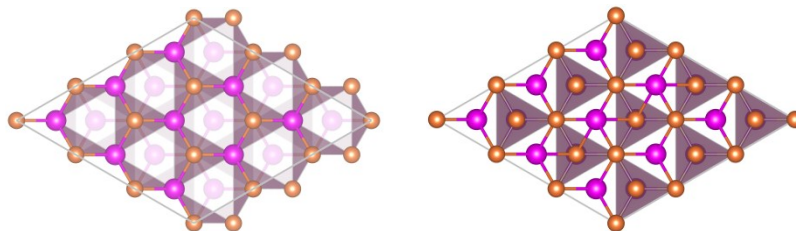

**Figure S1** Top views of In<sub>2</sub>Te<sub>3</sub> monolayer from the (a) *z* and (b) *-z* directions, respectively.

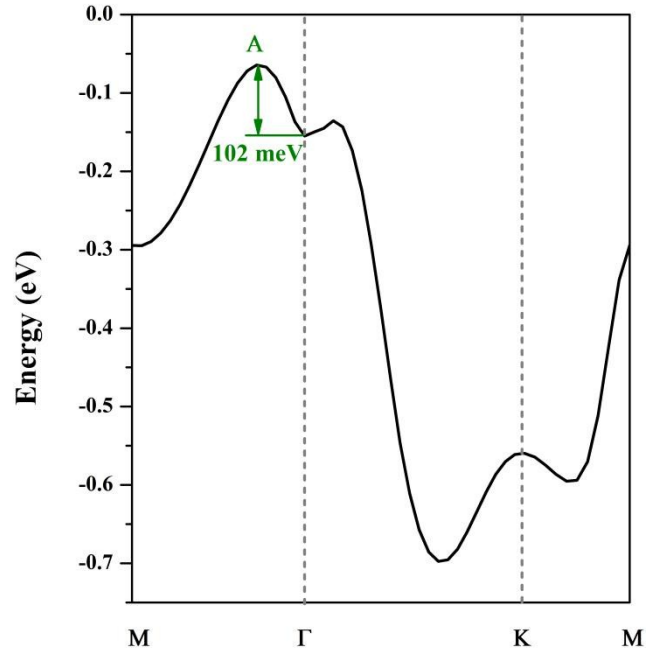

**Figure S2** The enlarged band of the VBM based on HSE06 level for  $\text{In}_2\text{Te}_3$  monolayer. The fermi level is set to 0 eV.

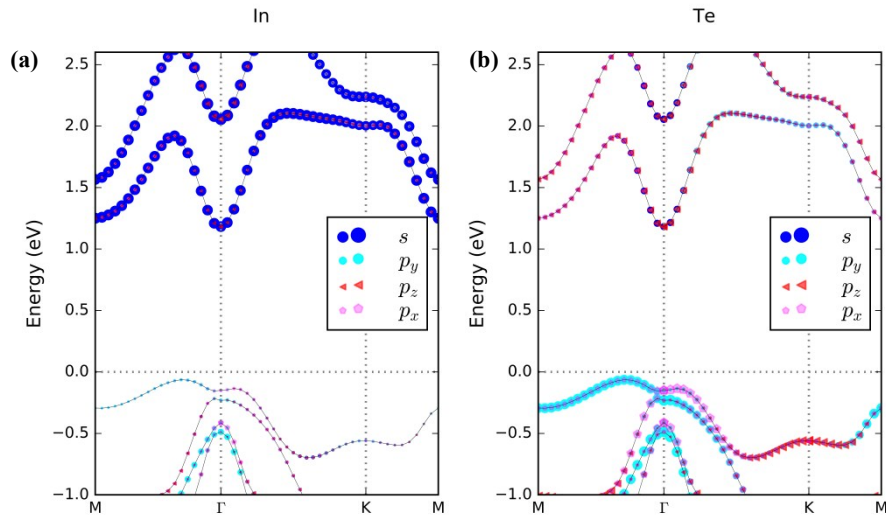

**Figure S3** Main projections of the band structures and the corresponding average projections weight of (a) In atoms and (b) Te atoms for  $\text{In}_2\text{Te}_3$  monolayer.

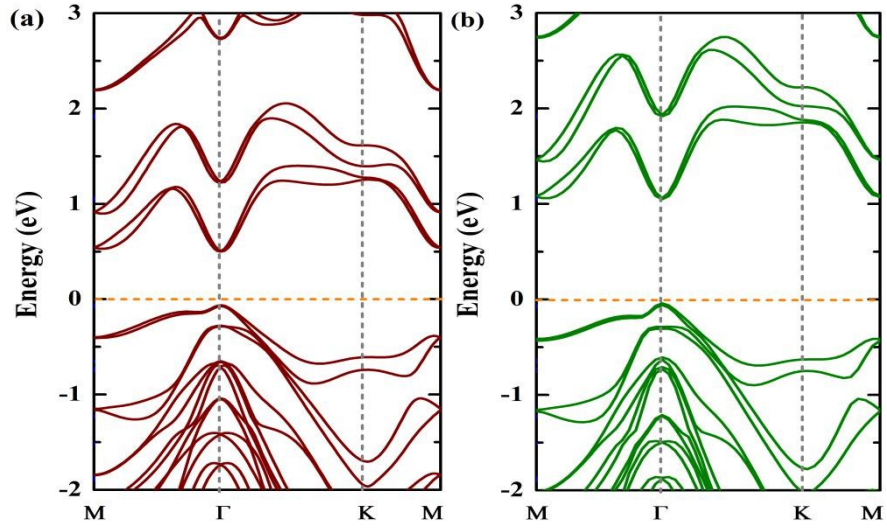

**Figure S4** Calculated the band structures of  $\text{In}_2\text{Te}_3$  monolayer by using (a) PBE+SOC and (b) HSE+SOC functionals, respectively. The dotted lines indicate the position of the Fermi level.

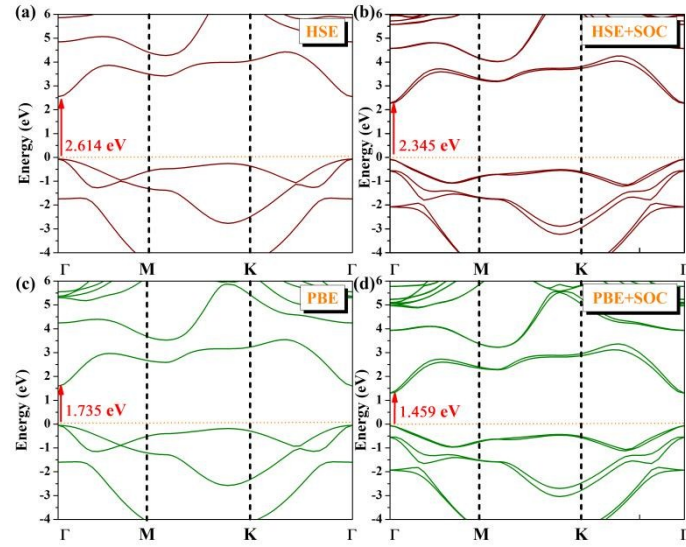

**Figure S5** Calculated the band structure of 2D  $\text{ZnTe}$  monolayer by using (a) HSE, (b) HSE+SOC, (c) PBE and (d) PBE+SOC functionals, respectively. The dotted lines indicate the position of the Fermi level.

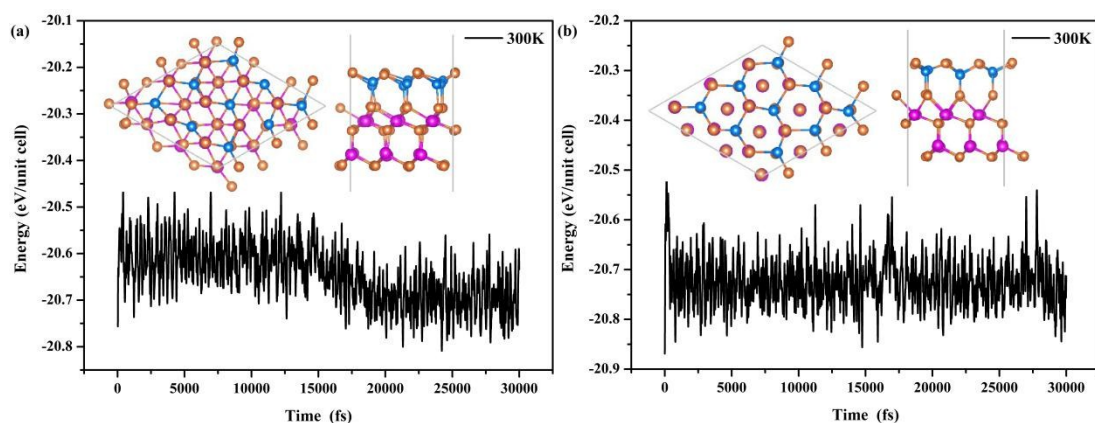

**Figure S6** Variations of the total energies of (a) A-ZnTe/In<sub>2</sub>Te<sub>3</sub> and (b) B-ZnTe/In<sub>2</sub>Te<sub>3</sub> heterostructures at 300 K during the time of 3 ps from AIMD simulation, respectively. Insets in (a) and (b) show the snapshots of the equilibrium structure from top and side views of the corresponding systems at 300K, respectively.

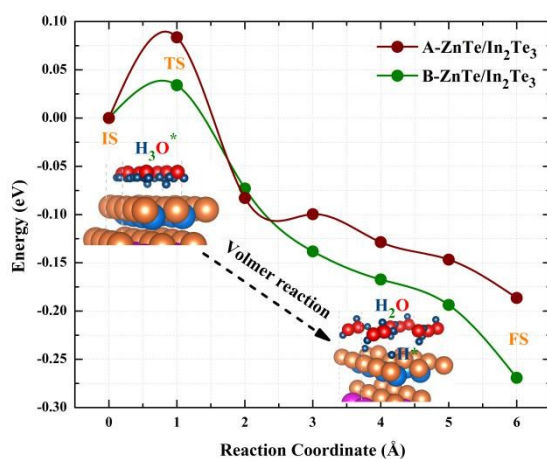

**Figure S7** Minimum energy pathways of the Volmer reaction on the surface of (a) A-ZnTe/In<sub>2</sub>Te<sub>3</sub> and (b) B-ZnTe/In<sub>2</sub>Te<sub>3</sub> heterostructures, respectively. The initial states contain one solvated proton and the final states the solvated proton has adsorbed on to the top Te site as  $\theta = 25\%$  coverage system. Insets show side views of the initial and final state structures.

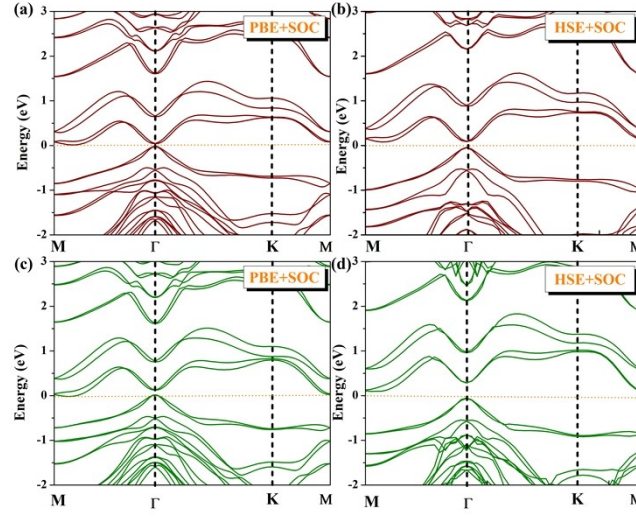

**Figure S8** Calculated the band structures of ZnTe/In<sub>2</sub>Te<sub>3</sub> heterostructures by using PBE+SOC and HSE+SOC functionals with (a-b) A and (c-d) B stacking orders, respectively. The dotted lines indicate the position of the Fermi level.

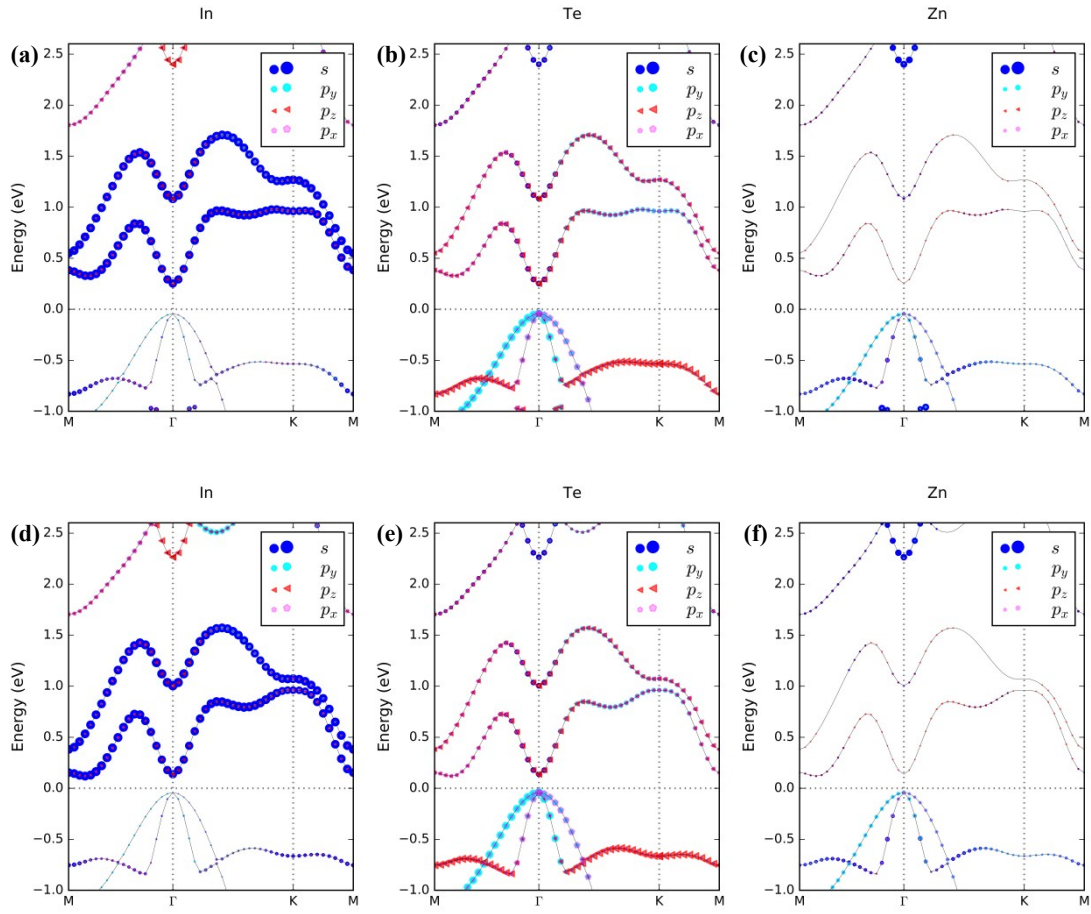

**Figure S9** Main projections of the band structures and the corresponding average projections weight of (a, d) In atoms, (b, e) Te atoms and (c, f) Zn atoms for A-ZnTe/In<sub>2</sub>Te<sub>3</sub> (upper) and B-ZnTe/In<sub>2</sub>Te<sub>3</sub> (dow) heterostructures.
